# Supplementary material
Source: MDPI journal article supplement (https://www.mdpi.com/1424-2818/15/2/260)
Supplement: s1 [file s1]

**Table S1.** List of *Anodonta anatina* (Linnaeus, 1758) COI sequences used in this study.

| Voucher/Code | Lineage | Country  | Freshwater Basin     | Basin             | Latitude   | Longitude   | COI seq. acc. number | Reference              |
|--------------|---------|----------|----------------------|-------------------|------------|-------------|----------------------|------------------------|
| biv156/1     | EUR2    | Russia   | Indiga River         | Arctic Basin      | 67.5012° N | 49.3144° E  | KY328448             | Bolotov et al., 2020   |
| biv156/2     | EUR2    | Russia   | Indiga River         |                   | 67.5012° N | 49.3144° E  | KY328449             | Bolotov et al., 2020   |
| biv156/3     | EUR2    | Russia   | Indiga River         |                   | 67.5012° N | 49.3144° E  | KY328450             | Bolotov et al., 2020   |
| biv156/4     | EUR2    | Russia   | Indiga River         |                   | 67.5012° N | 49.3144° E  | KY328451             | Tomilova et al., 2020a |
| biv156/5     | EUR2    | Russia   | Indiga River         |                   | 67.5012° N | 49.3144° E  | KY328452             | Tomilova et al., 2020a |
| biv157/1     | EUR2    | Russia   | Volga River          | Caspian Sea Basin | 45.3865° N | 47.3427° E  | KY328453             | Bolotov et al., 2020   |
| biv157/2     | EUR2    | Russia   | Volga River          |                   | 45.3865° N | 47.3427° E  | KY328454             | Bolotov et al., 2020   |
| biv158/1     | EUR2    | Russia   | Yenisey River        | Arctic Basin      | 55.9550° N | 110.7073° E | KY328455             | Bolotov et al., 2020   |
| biv158/2     | EUR2    | Russia   | Yenisey River        |                   | 55.9550° N | 110.7073° E | KY328456             | Bolotov et al., 2020   |
| biv158/3     | EUR2    | Russia   | Yenisey River        |                   | 55.9550° N | 110.7073° E | KY328457             | Bolotov et al., 2020   |
| biv164/1     | EUR2    | Russia   | Onega River          | Black Sea Basin   | 63.8296° N | 38.4573° E  | KY328459             | Bolotov et al., 2020   |
| biv168/1     | EUR2    | Russia   | Northern Dvina River |                   | 63.5080° N | 41.6216° E  | KY328460             | Bolotov et al., 2020   |
| biv168/2     | EUR2    | Russia   | Northern Dvina River |                   | 63.5080° N | 41.6216° E  | KY328461             | Bolotov et al., 2020   |
| biv168/3     | EUR2    | Russia   | Northern Dvina River |                   | 63.5080° N | 41.6216° E  | KY328462             | Bolotov et al., 2020   |
| biv170/1     | EUR2    | Bulgaria | Kamchia River        |                   | 43.0584° N | 26.9534° E  | KY328463             | Bolotov et al., 2020   |
| biv170/2     | EUR2    | Bulgaria | Kamchia River        | Arctic Basin      | 43.0584° N | 26.9534° E  | KY328464             | Bolotov et al., 2020   |
| biv170/3     | EUR2    | Bulgaria | Kamchia River        |                   | 43.0584° N | 26.9534° E  | KY328465             | Bolotov et al., 2020   |
| biv173/1     | EUR2    | Russia   | Taz River            |                   | 63.5768° N | 83.8644° E  | KY328466             | Bolotov et al., 2020   |
| biv173/2     | EUR2    | Russia   | Taz River            | Caspian Sea Basin | 63.5768° N | 83.8644° E  | KY328467             | Bolotov et al., 2020   |
| biv173/3     | EUR2    | Russia   | Taz River            |                   | 63.5768° N | 83.8644° E  | KY328468             | Bolotov et al., 2020   |
| biv174/1     | EUR2    | Russia   | Volga River          | Caspian Sea Basin | 45.7669° N | 47.8862° E  | KY328469             | Bolotov et al., 2020   |
| biv174/2     | EUR2    | Russia   | Volga River          |                   | 45.7669° N | 47.8862° E  | KY328470             | Bolotov et al., 2020   |
| biv189/1     | EUR2    | Russia   | Keret River          | Arctic Basin      | 66.1592° N | 32.6471° E  | KY328471             | Bolotov et al., 2020   |
| biv189/3     | EUR2    | Russia   | Keret River          |                   | 66.1592° N | 32.6471° E  | KY328472             | Bolotov et al., 2020   |
| biv189/8     | EUR2    | Russia   | Keret River          |                   | 66.1592° N | 32.6471° E  | KY328473             | Bolotov et al., 2020   |
| biv190/2     | EUR2    | Russia   | Yenisei River        | Arctic Basin      | 51.2590° N | 106.4982° E | KY328474             | Bolotov et al., 2020   |
| biv190/3     | EUR2    | Russia   | Yenisei River        |                   | 51.2590° N | 106.4982° E | KY328475             | Bolotov et al., 2020   |
| biv190/4     | EUR2    | Russia   | Yenisei River        |                   | 51.2590° N | 106.4982° E | KY328476             | Bolotov et al., 2020   |
| biv190/5     | EUR2    | Russia   | Yenisei River        |                   | 51.2590° N | 106.4982° E | KY328477             | Tomilova et al., 2020a |
| biv190/7     | EUR2    | Russia   | Yenisei River        |                   | 51.2590° N | 106.4982° E | KY328478             | Tomilova et al., 2020a |
| biv192/1     | AZOV    | Russia   | Kuban River          | Azov Sea Basin    | 45.2481° N | 37.4975° E  | KY328479             | Bolotov et al., 2020   |
| biv194/4     | EUR2    | Russia   | Volga River          | Caspian Sea Basin | 55.8650° N | 38.0010° E  | KY328480             | Bolotov et al., 2020   |
| biv194/5     | EUR2    | Russia   | Volga River          |                   | 55.8650° N | 38.0010° E  | KY328481             | Bolotov et al., 2020   |
| biv194/7     | EUR2    | Russia   | Volga River          | Arctic Basin      | 55.8650° N | 38.0010° E  | KY328482             | Bolotov et al., 2020   |
| biv198/1     | EUR2    | Russia   | Ob River             |                   | 54.3206° N | 84.3938° E  | KY328483             | Bolotov et al., 2020   |
| biv198/2     | EUR2    | Russia   | Ob River             |                   | 54.3206° N | 84.3938° E  | KY328484             | Bolotov et al., 2020   |
| biv198/3     | EUR2    | Russia   | Ob River             |                   | 54.3206° N | 84.3938° E  | KY328485             | Bolotov et al., 2020   |
| biv198/4     | EUR2    | Russia   | Ob River             |                   | 54.3206° N | 84.3938° E  | KY328486             | Tomilova et al., 2020a |
| biv198/6     | EUR2    | Russia   | Ob River             |                   | 54.3206° N | 84.3938° E  | KY328487             | Tomilova et al., 2020a |
| biv199/1     | EUR2    | Russia   | Lena River           | Arctic Basin      | 62.5689° N | 130.8861° E | KY328488             | Bolotov et al., 2020   |
| biv199/2     | EUR2    | Russia   | Lena River           |                   | 62.5689° N | 130.8861° E | KY328489             | Bolotov et al., 2020   |
| biv199/3     | EUR2    | Russia   | Lena River           |                   | 62.5689° N | 130.8861° E | KY328490             | Bolotov et al., 2020   |

| Voucher/Code | Lineage | Country           | Freshwater Basin     | Basin                       | Latitude    | Longitude   | COI seq. acc. number | Reference              |
|--------------|---------|-------------------|----------------------|-----------------------------|-------------|-------------|----------------------|------------------------|
| biv199/5     | EUR2    | Russia            | Lena River           | Arctic Basin                | 62.5689° N  | 130.8861° E | KY328491             | Tomilova et al., 2020a |
| biv199/6     | EUR2    | Russia            | Lena River           |                             | 62.5689° N  | 130.8861° E | KY328492             | Tomilova et al., 2020a |
| biv206/1     | EUR2    | Russia            | Pechora River        |                             | 67.0291° N  | 51.1275° E  | KY328493             | Bolotov et al., 2020   |
| biv206/2     | EUR2    | Russia            | Pechora River        |                             | 67.0291° N  | 51.1275° E  | KY328494             | Tomilova et al., 2020a |
| biv208/1     | AZOV    | Russia            | Don River            | Azov Sea Basin              | 49.2421° N  | 43.9255° E  | KY328495             | Bolotov et al., 2020   |
| biv208/3     | AZOV    | Russia            | Don River            |                             | 49.2421° N  | 43.9255° E  | KY328496             | Bolotov et al., 2020   |
| biv209       | EUR2    | Russia            | Volga River          | Caspian Sea Basin           | 54.8451° N  | 37.9849° E  | KY328497             | Bolotov et al., 2020   |
| biv210/1     | EUR2    | Russia            | Pechora River        | Arctic Basin                | 68.1305° N  | 53.5269° E  | KY328498             | Bolotov et al., 2020   |
| biv210/3     | EUR2    | Russia            | Pechora River        |                             | 68.1305° N  | 53.5269° E  | KY328499             | Bolotov et al., 2020   |
| biv210/4     | EUR2    | Russia            | Pechora River        |                             | 68.1305° N  | 53.5269° E  | KY328500             | Tomilova et al., 2020a |
| biv210/5     | EUR2    | Russia            | Pechora River        |                             | 68.1305° N  | 53.5269° E  | KY328501             | Tomilova et al., 2020a |
| 669/2        | EUR2    | Russia            | Northern Dvina River |                             | 64.1414° N  | 41.7653° E  | KY328502             | Bolotov et al., 2020   |
| 669/12       | EUR2    | Russia            | Northern Dvina River |                             | 64.1414° N  | 41.7653° E  | KY328503             | Bolotov et al., 2020   |
| 669/23       | EUR2    | Russia            | Northern Dvina River |                             | 64.1414° N  | 41.7653° E  | KY328504             | Bolotov et al., 2020   |
| 670/1        | EUR2    | Russia            | Kuloi River          |                             | 65.0007° N  | 41.2693° E  | KY328505             | Bolotov et al., 2020   |
| 670/4        | EUR2    | Russia            | Kuloi River          |                             | 65.0007° N  | 41.2693° E  | KY328506             | Bolotov et al., 2020   |
| 670/7        | EUR2    | Russia            | Kuloi River          |                             | 65.0007° N  | 41.2693° E  | KY328507             | Bolotov et al., 2020   |
| 670/8        | EUR2    | Russia            | Kuloi River          |                             | 65.0007° N  | 41.2693° E  | KY328508             | Tomilova et al., 2020a |
| 1HH          | EUR2    | Russia            | Northern Dvina River |                             | 64.4561° N  | 40.5813° E  | KY328509             | Bolotov et al., 2020   |
| 2HH          | EUR2    | Russia            | Northern Dvina River |                             | 64.4561° N  | 40.5813° E  | KY328510             | Bolotov et al., 2020   |
| 4HH          | EUR2    | Russia            | Northern Dvina River |                             | 64.4561° N  | 40.5813° E  | KY328511             | Bolotov et al., 2020   |
| biv277/2     | EUR2    | Russia            | Dnieper River        | Black Sea Basin             | 51.7699° N  | 36.2186° E  | MK574149             | Bolotov et al., 2020   |
| biv277/3     | EUR2    | Russia            | Dnieper River        |                             | 51.7699° N  | 36.2186° E  | MK574150             | Bolotov et al., 2020   |
| biv277/4     | EUR2    | Russia            | Dnieper River        |                             | 51.7699° N  | 36.2186° E  | MK574151             | Bolotov et al., 2020   |
| biv277/5     | EUR2    | Russia            | Dnieper River        |                             | 51.7699° N  | 36.2186° E  | MT027824             | Tomilova et al., 2020a |
| biv282/2     | AZOV    | Russia            | Don River            | Azov Sea Basin              | 51.5630° N  | 43.1530° E  | MK574152             | Bolotov et al., 2020   |
| biv282/3     | AZOV    | Russia            | Don River            |                             | 51.5630° N  | 43.1530° E  | MK574153             | Bolotov et al., 2020   |
| biv282/4     | AZOV    | Russia            | Don River            |                             | 51.5630° N  | 43.1530° E  | MK574154             | Bolotov et al., 2020   |
| biv306/2     | EUR2    | Russia            | Volga River          | Caspian Sea Basin           | 48.4244° N  | 44.9181° E  | MK574155             | Bolotov et al., 2020   |
| biv307/2     | AZOV    | Russia            | Kagalnik River       | Azov Sea Basin              | 46.8762° N  | 39.6995° E  | MK574156             | Bolotov et al., 2020   |
| biv307/3     | AZOV    | Russia            | Kagalnik River       |                             | 46.8762° N  | 39.6995° E  | MK574157             | Bolotov et al., 2020   |
| 616S         | EUR2    | Russia            | Northern Dvina River | Arctic Basin                | 61.2785° N  | 48.6681° E  | MK574158             | Bolotov et al., 2020   |
| biv315       | EUR1    | Turkey            | Orontes River        | Eastern Mediterranean Basin | 36.4650° N  | 36.3799° E  | MT027825             | Tomilova et al., 2020a |
| biv318/1     | EUR1    | Turkey            | Orontes River        |                             | 36.4298° N  | 36.3833° E  | MT027826             | Tomilova et al., 2020a |
| biv318/2     | EUR1    | Turkey            | Orontes River        |                             | 36.4298° N  | 36.3833° E  | MT027827             | Tomilova et al., 2020a |
| biv318/4     | EUR1    | Turkey            | Orontes River        |                             | 36.4298° N  | 36.3833° E  | MT027828             | Tomilova et al., 2020a |
| biv318/5     | EUR1    | Turkey            | Orontes River        |                             | 36.4298° N  | 36.3833° E  | MT027829             | Tomilova et al., 2020a |
| biv318/6     | EUR1    | Turkey            | Orontes River        |                             | 36.4298° N  | 36.3833° E  | MT027830             | Tomilova et al., 2020a |
| biv318/9     | EUR1    | Turkey            | Orontes River        |                             | 36.4298° N  | 36.3833° E  | MT027831             | Tomilova et al., 2020a |
| biv481       | EUR2    | Georgia: Abkhazia | Bzyb River           | Black Sea Basin             | 43.1980° N° | 40.3031° E° | MT027832             | Tomilova et al., 2020a |
| biv552/1     | EUR2    | Russia            | Lopshenga River      | Arctic Basin                | 64.9542° N  | 37.5186° E  | MK574159             | Bolotov et al., 2020   |
| biv552/4     | EUR2    | Russia            | Lopshenga River      |                             | 64.9542° N  | 37.5186° E  | MT027833             | Tomilova et al., 2020a |

| Voucher/Code | Lineage | Country | Freshwater Basin | Basin          | Latitude   | Longitude  | COI seq. acc. number | Reference              |
|--------------|---------|---------|------------------|----------------|------------|------------|----------------------|------------------------|
| biv552/5     | EUR2    | Russia  | Lopshenga River  | Azov Sea Basin | 64.9542° N | 37.5186° E | MT027834             | Tomilova et al., 2020a |
| biv553/1     | EUR2    | Russia  | Solenoye Lake    |                | 64.8767° N | 38.9809° E | MK574160             | Bolotov et al., 2020   |
| biv553/2     | EUR2    | Russia  | Solenoye Lake    |                | 64.8767° N | 38.9809° E | MK574161             | Bolotov et al., 2020   |
| biv554/1     | AZOV    | Russia  | Kuban River      |                | 44.9497° N | 39.3544° E | MK574162             | Bolotov et al., 2020   |
| biv554/2     | AZOV    | Russia  | Kuban River      |                | 44.9497° N | 39.3544° E | MK574163             | Bolotov et al., 2020   |
| biv554/3     | AZOV    | Russia  | Kuban River      |                | 44.9497° N | 39.3544° E | MK574164             | Bolotov et al., 2020   |
| biv554/4     | AZOV    | Russia  | Kuban River      |                | 44.9497° N | 39.3544° E | MT027835             | Tomilova et al., 2020a |
| biv554/5     | AZOV    | Russia  | Kuban River      |                | 44.9497° N | 39.3544° E | MT027836             | Tomilova et al., 2020a |
| biv554/6     | AZOV    | Russia  | Kuban River      |                | 44.9497° N | 39.3544° E | MT027837             | Tomilova et al., 2020a |
| biv554/7     | AZOV    | Russia  | Kuban River      |                | 44.9497° N | 39.3544° E | MT027838             | Tomilova et al., 2020a |
| biv554/8     | AZOV    | Russia  | Kuban River      |                | 44.9497° N | 39.3544° E | MT027839             | Tomilova et al., 2020a |
| biv554/9     | AZOV    | Russia  | Kuban River      |                | 44.9497° N | 39.3544° E | MT027840             | Tomilova et al., 2020a |
| biv554/10    | AZOV    | Russia  | Kuban River      |                | 44.9497° N | 39.3544° E | MT027841             | Tomilova et al., 2020a |
| biv557/1     | AZOV    | Russia  | Kirpili River    |                | 45.3539° N | 39.8053° E | MK574165             | Bolotov et al., 2020   |
| biv557/2     | AZOV    | Russia  | Kirpili River    |                | 45.3539° N | 39.8053° E | MK574166             | Bolotov et al., 2020   |
| biv557/3     | AZOV    | Russia  | Kirpili River    |                | 45.3539° N | 39.8053° E | MK574167             | Bolotov et al., 2020   |
| biv557/4     | AZOV    | Russia  | Kirpili River    |                | 45.3539° N | 39.8053° E | MT027842             | Tomilova et al., 2020a |
| biv557/5     | AZOV    | Russia  | Kirpili River    |                | 45.3539° N | 39.8053° E | MT027843             | Tomilova et al., 2020a |
| biv557/6     | AZOV    | Russia  | Kirpili River    |                | 45.3539° N | 39.8053° E | MT027844             | Tomilova et al., 2020a |
| biv557/7     | AZOV    | Russia  | Kirpili River    | Arctic Basin   | 45.3539° N | 39.8053° E | MT027845             | Tomilova et al., 2020a |
| biv557/8     | AZOV    | Russia  | Kirpili River    |                | 45.3539° N | 39.8053° E | MT027846             | Tomilova et al., 2020a |
| biv557/9     | AZOV    | Russia  | Kirpili River    |                | 45.3539° N | 39.8053° E | MT027847             | Tomilova et al., 2020a |
| biv557/10    | AZOV    | Russia  | Kirpili River    |                | 45.3539° N | 39.8053° E | MT027848             | Tomilova et al., 2020a |
| biv558       | AZOV    | Russia  | Kirpili River    |                | 45.3539° N | 39.8053° E | MK574168             | Bolotov et al., 2020   |
| biv560/1     | AZOV    | Russia  | Don River        |                | 48.3406° N | 40.1096° E | MK574169             | Bolotov et al., 2020   |
| biv560/2     | AZOV    | Russia  | Don River        |                | 48.3406° N | 40.1096° E | MK574170             | Bolotov et al., 2020   |
| biv560/3     | AZOV    | Russia  | Don River        |                | 48.3406° N | 40.1096° E | MK574171             | Bolotov et al., 2020   |
| biv563       | AZOV    | Russia  | Don River        |                | 47.8438° N | 39.9030° E | MK574172             | Bolotov et al., 2020   |
| biv565/1     | AZOV    | Russia  | Don River        |                | 47.3582° N | 40.0632° E | MK574173             | Bolotov et al., 2020   |
| biv565/2     | AZOV    | Russia  | Don River        | Azov Sea Basin | 47.3582° N | 40.0632° E | MK574174             | Bolotov et al., 2020   |
| biv565/3     | AZOV    | Russia  | Don River        |                | 47.3582° N | 40.0632° E | MK574175             | Bolotov et al., 2020   |
| biv567/1     | EUR2    | Russia  | Onega River      |                | 61.3079° N | 38.8429° E | MT027849             | Tomilova et al., 2020a |
| biv567/2     | EUR2    | Russia  | Onega River      |                | 61.3079° N | 38.8429° E | MT027850             | Tomilova et al., 2020a |
| biv567/3     | EUR2    | Russia  | Onega River      |                | 61.3079° N | 38.8429° E | MT027851             | Tomilova et al., 2020a |
| biv569/2     | AZOV    | Russia  | Kuban River      |                | 45.2655° N | 37.3708° E | MK574177             | Bolotov et al., 2020   |
| biv569/3     | AZOV    | Russia  | Kuban River      |                | 45.2655° N | 37.3708° E | MK574178             | Bolotov et al., 2020   |
| biv569/4     | AZOV    | Russia  | Kuban River      |                | 45.2655° N | 37.3708° E | MT027852             | Tomilova et al., 2020a |
| biv569/5     | AZOV    | Russia  | Kuban River      |                | 45.2655° N | 37.3708° E | MT027853             | Tomilova et al., 2020a |
| biv569/6     | AZOV    | Russia  | Kuban River      |                | 45.2655° N | 37.3708° E | MT027854             | Tomilova et al., 2020a |
| biv569/7     | AZOV    | Russia  | Kuban River      | Caspian Sea    | 45.2655° N | 37.3708° E | MT027855             | Tomilova et al., 2020a |
| biv569/8     | AZOV    | Russia  | Kuban River      |                | 45.2655° N | 37.3708° E | MT027856             | Tomilova et al., 2020a |
| biv569/9     | AZOV    | Russia  | Kuban River      |                | 45.2655° N | 37.3708° E | MT027857             | Tomilova et al., 2020a |
| biv569/10    | AZOV    | Russia  | Kuban River      |                | 45.2655° N | 37.3708° E | MT027858             | Tomilova et al., 2020a |
| biv571/1     | EUR2    | Russia  | Volga River      |                | 54.6603° N | 39.8371° E | MK574179             | Bolotov et al., 2020   |

| Voucher/Code | Lineage | Country    | Freshwater Basin | Basin                       | Latitude   | Longitude   | COI seq. acc. number | Reference              |
|--------------|---------|------------|------------------|-----------------------------|------------|-------------|----------------------|------------------------|
| biv571/2     | EUR2    | Russia     | Volga River      | Basin                       | 54.6603° N | 39.8371° E  | MT027859             | Tomilova et al., 2020a |
| biv572/3     | EUR2    | Russia     | Volga River      |                             | 54.6603° N | 39.8371° E  | MK574180             | Bolotov et al., 2020   |
| biv573/4     | EUR2    | Russia     | Volga River      |                             | 54.6603° N | 39.8371° E  | MK574181             | Bolotov et al., 2020   |
| biv575/6     | EUR2    | Russia     | Volga River      |                             | 54.9798° N | 41.7753° E  | MT027860             | Tomilova et al., 2020a |
| biv585/1     | EUR2    | Russia     | Volga River      |                             | 54.8958° N | 55.8891° E  | MT027861             | Tomilova et al., 2020a |
| biv585/2     | EUR2    | Russia     | Volga River      |                             | 54.8958° N | 55.8891° E  | MT027862             | Tomilova et al., 2020a |
| biv585/3     | EUR2    | Russia     | Volga River      |                             | 54.8958° N | 55.8891° E  | MT027863             | Tomilova et al., 2020a |
| biv585/4     | EUR2    | Russia     | Volga River      |                             | 54.8958° N | 55.8891° E  | MT027864             | Tomilova et al., 2020a |
| biv591/1     | EUR2    | Russia     | Volga River      |                             | 47.2531° N | 47.0418° E  | MT027865             | Tomilova et al., 2020a |
| biv591/2     | EUR2    | Russia     | Volga River      |                             | 47.2531° N | 47.0418° E  | MT027866             | Tomilova et al., 2020a |
| biv591/5     | EUR2    | Russia     | Volga River      |                             | 47.2531° N | 47.0418° E  | MT027867             | Tomilova et al., 2020a |
| biv593/1     | EUR2    | Kazakhstan | Ural River       |                             | 50.7131° N | 51.3808 ° E | MK603925             | Bolotov et al., 2020   |
| biv593/2     | EUR2    | Kazakhstan | Ural River       |                             | 50.7131° N | 51.3808 ° E | MK603926             | Bolotov et al., 2020   |
| biv593/3     | EUR2    | Kazakhstan | Ural River       |                             | 50.7131° N | 51.3808 ° E | MK603927             | Bolotov et al., 2020   |
| biv593/4     | EUR2    | Kazakhstan | Ural River       |                             | 50.7131° N | 51.3808 ° E | MK603928             | Bolotov et al., 2020   |
| biv593/5     | EUR2    | Kazakhstan | Ural River       |                             | 50.7131° N | 51.3808 ° E | MK603929             | Bolotov et al., 2020   |
| biv596/3     | EUR2    | Russia     | Volga River      | Baltic Sea Basin            | 55.7012° N | 36.7209° E  | MT027868             | Tomilova et al., 2020a |
| biv596/5     | EUR2    | Russia     | Volga River      |                             | 55.7012° N | 36.7209° E  | MT027869             | Tomilova et al., 2020a |
| biv597/1     | EUR2    | Russia     | Velikaya River   | Arctic Basin                | 56.4631° N | 29.1139° E  | MT027870             | Tomilova et al., 2020a |
| biv622/1     | EUR2    | Kazakhstan | Ob River         |                             | 49.8012° N | 82.6261° E  | MT027871             | Tomilova et al., 2020a |
| biv622/2     | EUR2    | Kazakhstan | Ob River         |                             | 49.8012° N | 82.6261° E  | MT027872             | Tomilova et al., 2020a |
| biv622/3     | EUR2    | Kazakhstan | Ob River         |                             | 49.8012° N | 82.6261° E  | MT027873             | Tomilova et al., 2020a |
| biv622/4     | EUR2    | Kazakhstan | Ob River         | Caspian Sea Basin           | 49.8012° N | 82.6261° E  | MT027874             | Tomilova et al., 2020a |
| biv723/1     | EUR2    | Russia     | Ak-Gel Lake      |                             | 42.9604° N | 47.5423° E  | MT027875             | Tomilova et al., 2020a |
| biv723/2     | EUR2    | Russia     | Ak-Gel Lake      | Azov Sea Basin              | 42.9604° N | 47.5423° E  | MT027876             | Tomilova et al., 2020a |
| biv724/1     | AZOV    | Russia     | Beisug River     |                             | 45.8427° N | 39.0525° E  | MT027877             | Tomilova et al., 2020a |
| biv724/2     | AZOV    | Russia     | Beisug River     |                             | 45.8427° N | 39.0525° E  | MT027878             | Tomilova et al., 2020a |
| biv724/3     | AZOV    | Russia     | Beisug River     |                             | 45.8427° N | 39.0525° E  | MT027879             | Tomilova et al., 2020a |
| biv726/1     | AZOV    | Russia     | Chelbas River    |                             | 46.0837° N | 38.9769° E  | MT027880             | Tomilova et al., 2020a |
| biv726/3     | AZOV    | Russia     | Chelbas River    |                             | 46.0837° N | 38.9769° E  | MT027881             | Tomilova et al., 2020a |
| biv726/6     | AZOV    | Russia     | Chelbas River    |                             | 46.0837° N | 38.9769° E  | MT027882             | Tomilova et al., 2020a |
| biv727/3     | AZOV    | Russia     | Kuban River      |                             | 44.8929° N | 38.8456° E  | MT027883             | Tomilova et al., 2020a |
| biv727/4     | AZOV    | Russia     | Kuban River      |                             | 44.8929° N | 38.8456° E  | MT027884             | Tomilova et al., 2020a |
| biv727/7     | AZOV    | Russia     | Kuban River      |                             | 44.8929° N | 38.8456° E  | MT027885             | Tomilova et al., 2020a |
| biv731       | AZOV    | Russia     | Yeya River       |                             | 46.5481° N | 39.0661° E  | MT027886             | Tomilova et al., 2020a |
| biv732/2     | AZOV    | Russia     | Yeya River       |                             | 46.5732° N | 39.6331° E  | MT027887             | Tomilova et al., 2020a |
| biv732/4     | AZOV    | Russia     | Yeya River       |                             | 46.5732° N | 39.6331° E  | MT027888             | Tomilova et al., 2020a |
| biv732/5     | AZOV    | Russia     | Yeya River       |                             | 46.5732° N | 39.6331° E  | MT027889             | Tomilova et al., 2020a |
| AA5T         | EUR1    | Turkey     | Orontes River    | Eastern Mediterranean Basin | 36.4962° N | 36.4807° E  | MT328818             | Tomilova et al., 2020b |
| AA10T        | EUR1    | Turkey     | Orontes River    |                             | 36.4962° N | 36.4807° E  | MT328819             | Tomilova et al., 2020b |
| AA12T        | EUR1    | Turkey     | Orontes River    |                             | 36.4962° N | 36.4807° E  | MT328820             | Tomilova et al., 2020b |
| AA14T        | EUR1    | Turkey     | Orontes River    |                             | 36.4962° N | 36.4807° E  | MT328821             | Tomilova et al., 2020b |
| AA21T        | EUR1    | Turkey     | Orontes River    |                             | 36.4962° N | 36.4807° E  | MT328822             | Tomilova et al., 2020b |
| biv746/1     | EUR2    | Belarus    | Dnieper River    | Black Sea Basin             | 52.3148° N | 30.9532° E  | OQ121688             | Present study          |
| biv746/2     | EUR2    | Belarus    | Dnieper River    |                             | 52.3148° N | 30.9532° E  | OQ121689             | Present study          |

| Voucher/Code | Lineage | Country | Freshwater Basin | Basin             | Latitude   | Longitude  | COI seq. acc. number | Reference     |
|--------------|---------|---------|------------------|-------------------|------------|------------|----------------------|---------------|
| biv769/3     | AZOV2   | Russia  | Don River        | Azov Sea Basin    | 50.8387° N | 39.0757° E | OQ121690             | Present study |
| biv777/1     | EUR1    | Moldova | Danube River     | Black Sea Basin   | 47.8700° N | 27.2552° E | OQ121691             | Present study |
| biv777/2     | EUR1    | Moldova | Danube River     |                   | 47.8700° N | 27.2552° E | OQ121692             | Present study |
| biv777/3     | EUR1    | Moldova | Danube River     |                   | 47.8700° N | 27.2552° E | OQ121693             | Present study |
| biv777/4     | EUR1    | Moldova | Danube River     |                   | 47.8700° N | 27.2552° E | OQ121694             | Present study |
| biv777/5     | EUR2    | Moldova | Danube River     |                   | 47.8700° N | 27.2552° E | OQ121695             | Present study |
| biv778/1     | EUR2    | Moldova | Dniester River   |                   | 47.2847° N | 29.1252° E | OQ121696             | Present study |
| biv778/2     | EUR2    | Moldova | Dniester River   |                   | 47.2847° N | 29.1252° E | OQ121697             | Present study |
| biv778/3     | EUR2    | Moldova | Dniester River   |                   | 47.2847° N | 29.1252° E | OQ121698             | Present study |
| biv778/4     | EUR2    | Moldova | Dniester River   |                   | 47.2847° N | 29.1252° E | OQ121699             | Present study |
| biv778/5     | EUR2    | Moldova | Dniester River   |                   | 47.2847° N | 29.1252° E | OQ121700             | Present study |
| biv787/5     | EUR2    | Russia  | Volga River      | Caspian Sea Basin | 46.6859° N | 48.0747° E | OQ121701             | Present study |
| biv797/2     | EUR2    | France  | Garonne River    | Atlantic Basin    | 43.3919° N | 1.6915° E  | OQ121702             | Present study |
| biv797/5     | EUR2    | France  | Garonne River    |                   | 43.3919° N | 1.6915° E  | OQ121703             | Present study |
| biv797/6     | EUR1    | France  | Garonne River    |                   | 43.3919° N | 1.6915° E  | OQ121704             | Present study |
| biv1121/1    | EUR2    | Russia  | Neva River       | Baltic Sea Basin  | 61.1110° N | 32.5514° E | OQ121705             | Present study |
| biv1135/1    | AZOV    | Russia  | Don River        | Azov Sea Basin    | 47.4646° N | 40.4793° E | OQ121706             | Present study |
| biv1135/2    | AZOV    | Russia  | Don River        |                   | 47.4646° N | 40.4793° E | OQ121707             | Present study |
| biv1135/3    | AZOV    | Russia  | Don River        |                   | 47.4646° N | 40.4793° E | OQ121708             | Present study |
| biv1137/1    | EUR2    | Russia  | Volga River      | Caspian Sea Basin | 48.0994° N | 46.0826° E | OQ121709             | Present study |
| biv1137/3    | EUR2    | Russia  | Volga River      |                   | 48.0994° N | 46.0826° E | OQ121711             | Present study |
| biv1143/1    | EUR2    | Russia  | Volga River      |                   | 53.1362° N | 48.2646° E | OQ121712             | Present study |
| biv1143/2    | EUR2    | Russia  | Volga River      |                   | 53.1362° N | 48.2646° E | OQ121713             | Present study |
| biv1143/3    | EUR2    | Russia  | Volga River      |                   | 53.1362° N | 48.2646° E | OQ121714             | Present study |
| biv1151/1    | EUR2    | Russia  | Volga River      |                   | 51.7089° N | 46.7015° E | OQ121715             | Present study |
| biv1151/2    | EUR2    | Russia  | Volga River      |                   | 51.7089° N | 46.7015° E | OQ121716             | Present study |
| biv1151/3    | EUR2    | Russia  | Volga River      |                   | 51.7089° N | 46.7015° E | OQ121717             | Present study |
| biv1161/1    | EUR2    | Russia  | Volga River      |                   | 53.2206° N | 50.4691° E | OQ121718             | Present study |
| biv1161/2    | EUR2    | Russia  | Volga River      |                   | 53.2206° N | 50.4691° E | OQ121719             | Present study |
| biv1161/3    | EUR2    | Russia  | Volga River      |                   | 53.2206° N | 50.4691° E | OQ121720             | Present study |
| biv1234/4    | EUR2    | Belarus | Neman River      | Baltic Sea Basin  | 53.7409° N | 24.2122° E | OQ121721             | Present study |
| biv1234/5    | EUR2    | Belarus | Neman River      |                   | 53.7409° N | 24.2122° E | OQ121722             | Present study |
| biv1236/1    | EUR2    | Belarus | Neman River      |                   | 53.5230° N | 24.1952° E | OQ121723             | Present study |
| biv1236/2    | EUR2    | Belarus | Neman River      |                   | 53.5230° N | 24.1952° E | OQ121724             | Present study |
| biv1236/3    | EUR2    | Belarus | Neman River      |                   | 53.5230° N | 24.1952° E | OQ121725             | Present study |
| biv1236/4    | EUR2    | Belarus | Neman River      |                   | 53.5230° N | 24.1952° E | OQ121726             | Present study |
| biv1236/5    | EUR2    | Belarus | Neman River      |                   | 53.5230° N | 24.1952° E | OQ121727             | Present study |
| biv1241/1    | EUR2    | Belarus | Neman River      |                   | 54.8865° N | 26.9015° E | OQ121728             | Present study |
| biv1241/2    | EUR2    | Belarus | Neman River      | Caspian Sea Basin | 54.8865° N | 26.9015° E | OQ121729             | Present study |
| biv1384/10   | EUR2    | Russia  | Volga River      |                   | 55.5932° N | 39.5758° E | OQ121730             | Present study |
| biv1406/2    | EUR2    | Russia  | Dnieper River    | Black Sea Basin   | 54.7708° N | 31.2857° E | OQ121731             | Present study |
| biv1406/4    | EUR2    | Russia  | Dnieper River    |                   | 54.7708° N | 31.2857° E | OQ121732             | Present study |
| biv1406/15   | EUR2    | Russia  | Dnieper River    |                   | 54.7708° N | 31.2857° E | OQ121733             | Present study |
| biv1412/1    | EUR2    | Russia  | Ob River         | Arctic Basin      | 53.3957° N | 83.7952° E | OQ121734             | Present study |



| Voucher/Code | Lineage | Country | Freshwater Basin   | Basin             | Latitude   | Longitude   | COI seq. acc. number | Reference            |
|--------------|---------|---------|--------------------|-------------------|------------|-------------|----------------------|----------------------|
| biv1412/2    | EUR2    | Russia  | Ob River           | Caspian Sea Basin | 53.3957° N | 83.7952° E  | OQ121735             | Present study        |
| biv1412/3    | EUR2    | Russia  | Ob River           |                   | 53.3957° N | 83.7952° E  | OQ121736             | Present study        |
| biv1415/1    | EUR2    | Russia  | Ob River           |                   | 52.4996° N | 85.1734° E  | OQ121737             | Present study        |
| biv1415/2    | EUR2    | Russia  | Ob River           |                   | 52.4996° N | 85.1734° E  | OQ121738             | Present study        |
| biv1415/3    | EUR2    | Russia  | Ob River           |                   | 52.4996° N | 85.1734° E  | OQ121739             | Present study        |
| biv1416/1    | EUR2    | Russia  | Ob River           |                   | 51.9716° N | 85.7618° E  | OQ121740             | Present study        |
| biv1416/2    | EUR2    | Russia  | Ob River           |                   | 51.9716° N | 85.7618° E  | OQ121741             | Present study        |
| biv1416/3    | EUR2    | Russia  | Ob River           |                   | 51.9716° N | 85.7618° E  | OQ121742             | Present study        |
| biv1417/1    | EUR2    | Russia  | Volga River        |                   | 56.8834° N | 59.0467° E  | OQ121743             | Present study        |
| biv1417/2    | EUR2    | Russia  | Volga River        |                   | 56.8834° N | 59.0467° E  | OQ121744             | Present study        |
| biv1417/3    | EUR2    | Russia  | Volga River        |                   | 56.8834° N | 59.0467° E  | OQ121745             | Present study        |
| biv1420/1    | EUR2    | Russia  | Volga River        |                   | 57.3551° N | 56.9098° E  | OQ121746             | Present study        |
| biv1425/1    | EUR2    | Russia  | Volga River        |                   | 60.3818° N | 56.5051° E  | OQ121747             | Present study        |
| biv1425/2    | EUR2    | Russia  | Volga River        |                   | 60.3818° N | 56.5051° E  | OQ121748             | Present study        |
| biv1425/3    | EUR2    | Russia  | Volga River        |                   | 60.3818° N | 56.5051° E  | OQ121749             | Present study        |
| biv1427/1    | EUR2    | Russia  | Volga River        |                   | 57.2376° N | 59.3228° E  | OQ121750             | Present study        |
| biv1427/2    | EUR2    | Russia  | Volga River        |                   | 57.2376° N | 59.3228° E  | OQ121751             | Present study        |
| biv1427/3    | EUR2    | Russia  | Volga River        |                   | 57.2376° N | 59.3228° E  | OQ121752             | Present study        |
| biv1434/1    | EUR2    | Russia  | Volga River        |                   | 56.1352° N | 48.3343° E  | OQ121753             | Present study        |
| biv1434/2    | EUR2    | Russia  | Volga River        |                   | 56.1352° N | 48.3343° E  | OQ121754             | Present study        |
| biv1434/3    | EUR2    | Russia  | Volga River        |                   | 56.1352° N | 48.3343° E  | OQ121755             | Present study        |
| biv1451/1    | AZOV    | Russia  | Dagomys River      | Black Sea Basin   | 43.6980° N | 39.6852° E  | OQ121756             | Present study        |
| biv1451/2    | AZOV    | Russia  | Dagomys River      |                   | 43.6980° N | 39.6852° E  | OQ121757             | Present study        |
| biv1451/3    | AZOV    | Russia  | Dagomys River      |                   | 43.6980° N | 39.6852° E  | OQ121758             | Present study        |
| biv1662/1    | EUR2    | Russia  | Mamonovka River    | Baltic Sea Basin  | 54.4591° N | 20.1353° E  | OQ121759             | Present study        |
| biv1662/2    | EUR2    | Russia  | Mamonovka River    |                   | 54.4591° N | 20.1353° E  | OQ121760             | Present study        |
| biv1662/3    | EUR2    | Russia  | Mamonovka River    |                   | 54.4591° N | 20.1353° E  | OQ121761             | Present study        |
| biv1666      | EUR2    | Russia  | Pregolya River     |                   | 54.5229° N | 22.0748° E  | OQ121762             | Present study        |
| biv1673/1    | EUR2    | Russia  | Pregolya River     | Arctic Basin      | 54.4959° N | 21.1935° E  | OQ121763             | Present study        |
| biv1682/2    | EUR2    | Russia  | Ob River           |                   | 56.9702° N | 60.7366° E  | OQ121765             | Present study        |
| biv1682/3    | EUR2    | Russia  | Ob River           |                   | 56.9702° N | 60.7366° E  | OQ121766             | Present study        |
| biv1682/4    | EUR2    | Russia  | Ob River           |                   | 56.9702° N | 60.7366° E  | OQ121767             | Present study        |
| biv1682/5    | EUR2    | Russia  | Ob River           |                   | 56.9702° N | 60.7366° E  | OQ121768             | Present study        |
| BIV0199      | EUR2    | Ukraine | Dnieper River      | Black Sea Basin   | -          | -           | MH062759             | Klishko et al., 2018 |
| BIV0201      | EUR2    | Ukraine | Dniester River     |                   | -          | -           | MH062760             | Klishko et al., 2018 |
| BIV0202      | EUR2    | Ukraine | Dniester River     |                   | -          | -           | MH062761             | Klishko et al., 2018 |
| BIV0205      | EUR1    | Ukraine | Southern Bug River |                   | -          | -           | MH062763             | Klishko et al., 2018 |
| BIV0206      | EUR2    | Ukraine | Dnieper River      | Arctic Basin      | -          | -           | MH062764             | Klishko et al., 2018 |
| BIV0256      | EUR2    | Russia  | Lena River         |                   | 52.2921° N | 113.0898° E | MH062765             | Klishko et al., 2018 |
| BIV3374      | EUR2    | Russia  | Yenisei River      |                   | 52.2897° N | 106.4839° E | MH062766             | Klishko et al., 2018 |
| BIV3375      | EUR2    | Russia  | Yenisei River      |                   | 52.2897° N | 106.4839° E | MH062767             | Klishko et al., 2018 |
| BIV3377      | EUR2    | Russia  | Yenisei River      |                   | 51.4176° N | 106.5433° E | MH062768             | Klishko et al., 2018 |
| BIV3378      | EUR2    | Russia  | Yenisei River      |                   | 51.4176° N | 106.5433° E | MH062769             | Klishko et al., 2018 |
| BIV3379      | EUR2    | Russia  | Yenisei River      |                   | 51.4176° N | 106.5433° E | MH062770             | Klishko et al., 2018 |

| Voucher/Code | Lineage | Country        | Freshwater Basin | Basin                       | Latitude   | Longitude   | COI seq. acc. number | Reference            |
|--------------|---------|----------------|------------------|-----------------------------|------------|-------------|----------------------|----------------------|
| BIV3381      | EUR2    | Russia         | Yenisei River    | Western Mediterranean Basin | 51.4176° N | 106.5433° E | MH062771             | Klishko et al., 2018 |
| BIV3382      | EUR2    | Russia         | Yenisei River    |                             | 51.5600° N | 107.0090° E | MH062772             | Klishko et al., 2018 |
| BIV3383      | EUR2    | Russia         | Yenisei River    |                             | 51.5600° N | 107.0090° E | MH062773             | Klishko et al., 2018 |
| BIV3384      | EUR2    | Russia         | Yenisei River    |                             | 51.5600° N | 107.0090° E | MH062774             | Klishko et al., 2018 |
| BIV3385      | EUR2    | Russia         | Yenisei River    |                             | 51.5600° N | 107.0090° E | MH062775             | Klishko et al., 2018 |
| BIV3387      | EUR2    | Russia         | Yenisei River    |                             | 51.8473° N | 107.5583° E | MH062776             | Klishko et al., 2018 |
| BIV3388      | EUR2    | Russia         | Yenisei River    |                             | 51.8473° N | 107.5583° E | MH062777             | Klishko et al., 2018 |
| BIV3392      | EUR2    | Russia         | Lena River       |                             | 52.5972° N | 111.5001° E | MH062778             | Klishko et al., 2018 |
| BIV3393      | EUR2    | Russia         | Lena River       |                             | 52.5972° N | 111.5001° E | MH062779             | Klishko et al., 2018 |
| BIV3394      | EUR2    | Russia         | Lena River       |                             | 52.5972° N | 111.5001° E | MH062780             | Klishko et al., 2018 |
| BIV3395      | EUR2    | Russia         | Lena River       |                             | 52.5972° N | 111.5001° E | MH062781             | Klishko et al., 2018 |
| BIV3397      | EUR2    | Russia         | Lena River       |                             | 52.5972° N | 111.5001° E | MH062782             | Klishko et al., 2018 |
| BIV3399      | EUR2    | Russia         | Lena River       |                             | 52.5972° N | 111.5001° E | MH062783             | Klishko et al., 2018 |
| BIV3401      | EUR2    | Russia         | Yenisei River    |                             | 52.1555° N | 106.2637° E | MH062784             | Klishko et al., 2018 |
| BIV3402      | EUR2    | Russia         | Yenisei River    |                             | 52.1555° N | 106.2637° E | MH062785             | Klishko et al., 2018 |
| BIV3405      | EUR2    | Russia         | Yenisei River    |                             | 52.1555° N | 106.2637° E | MH062786             | Klishko et al., 2018 |
| BIV3406      | EUR2    | Russia         | Yenisei River    |                             | 52.1555° N | 106.2637° E | MH062787             | Klishko et al., 2018 |
| BIV3408      | EUR2    | Russia         | Yenisei River    |                             | 52.1555° N | 106.2637° E | MH062788             | Klishko et al., 2018 |
| BIV849       | ITAL    | Spain          | Jucar River      | Baltic Sea Basin            | 39.3176° N | 0.3962° W   | MF414228             | Froufe et al., 2017  |
| BIV965       | ITAL    | Spain          | Jucar River      |                             | 39.3114° N | 0.3205° W   | MF414229             | Froufe et al., 2017  |
| BIV1075      | ITAL    | Spain          | Ter River        |                             | 42.0096° N | 3.1249° E   | MF414226             | Froufe et al., 2017  |
| BIV1076      | ITAL    | Spain          | Ter River        |                             | 42.0096° N | 3.1249° E   | MF414227             | Froufe et al., 2017  |
| 73 F         | EUR2    | Poland         | Vistula River    | Adriatic Basin              | -          | -           | AF494102             | Soroka et al., 2008  |
| AA387        | ITAL    | Italy          | Po River         |                             | 45.9803° N | 8.6443° E   | KC583512             | Froufe et al., 2014  |
| AA389        | ITAL    | Italy          | Po River         |                             | 45.9803° N | 8.6443° E   | KC583514             | Froufe et al., 2014  |
| AA390        | ITAL    | Italy          | Po River         |                             | 45.9803° N | 8.6443° E   | KC583515             | Froufe et al., 2014  |
| AA391        | ITAL    | Italy          | Po River         |                             | 45.9803° N | 8.6443° E   | KC583516             | Froufe et al., 2014  |
| AA392        | ITAL    | Italy          | Po River         |                             | 45.9803° N | 8.6443° E   | KC583517             | Froufe et al., 2014  |
| AA393        | ITAL    | Italy          | Po River         |                             | 45.9803° N | 8.6443° E   | KC583518             | Froufe et al., 2014  |
| AA394        | ITAL    | Italy          | Po River         |                             | 45.9803° N | 8.6443° E   | KC583519             | Froufe et al., 2014  |
| Ai1          | IBER    | Portugal       | Mondego River    | Atlantic Basin              | -          | -           | KC583503             | Froufe et al., 2014  |
| Ai12         | IBER    | Portugal       | Mondego River    |                             | -          | -           | KC583504             | Froufe et al., 2014  |
| Ai13         | IBER    | Portugal       | Mondego River    |                             | -          | -           | KC583505             | Froufe et al., 2014  |
| Ai15         | IBER    | Portugal       | Mondego River    |                             | -          | -           | KC583506             | Froufe et al., 2014  |
| Ai20         | IBER    | Portugal       | Mondego River    |                             | -          | -           | KC583507             | Froufe et al., 2014  |
| Ai21         | IBER    | Portugal       | Mondego River    |                             | -          | -           | KC583508             | Froufe et al., 2014  |
| ACGOM1       | EUR1    | Hungary        | Danube River     | Black Sea Basin             | 47.6852° N | 19.1279° E  | KC583500             | Froufe et al., 2014  |
| ACGOM2       | EUR1    | Hungary        | Danube River     |                             | 47.6852° N | 19.1279° E  | KC583501             | Froufe et al., 2014  |
| ACGOM3       | EUR1    | Hungary        | Danube River     |                             | 47.6852° N | 19.1279° E  | KC583502             | Froufe et al., 2014  |
| AA70         | EUR1    | Hungary        | Danube River     |                             | 47.6852° N | 19.1279° E  | KC583489             | Froufe et al., 2014  |
| AA71         | EUR1    | Hungary        | Danube River     |                             | 47.6852° N | 19.1279° E  | KC583490             | Froufe et al., 2014  |
| AA72         | EUR1    | Hungary        | Danube River     |                             | 47.6852° N | 19.1279° E  | KC583491             | Froufe et al., 2014  |
| AA73         | EUR1    | Czech Republic | Elbe River       | North Sea Basin             | 50.2283° N | 14.6138° E  | KC583492             | Froufe et al., 2014  |
| AA74         | EUR2    | Czech Republic | Elbe River       |                             | 50.2283° N | 14.6138° E  | KC583493             | Froufe et al., 2014  |

| Voucher/Code | Lineage | Country        | Freshwater Basin   | Basin                       | Latitude   | Longitude  | COI seq. acc. number | Reference             |
|--------------|---------|----------------|--------------------|-----------------------------|------------|------------|----------------------|-----------------------|
| AA75         | EUR2    | Czech Republic | Elbe River         | Atlantic Basin              | 50.2283° N | 14.6138° E | KC583494             | Froufe et al., 2014   |
| AA76         | EUR1    | Czech Republic | Elbe River         |                             | 50.2283° N | 14.6138° E | KC583495             | Froufe et al., 2014   |
| AC77         | EUR1    | Czech Republic | Elbe River         |                             | 50.2283° N | 14.6138° E | KC583498             | Froufe et al., 2014   |
| AC79         | EUR2    | Czech Republic | Elbe River         |                             | 50.2283° N | 14.6138° E | KC583499             | Froufe et al., 2014   |
| AA83         | IBER    | Portugal       | Vouga River        |                             | -          | -          | KC583496             | Froufe et al., 2014   |
| AA87         | IBER    | Portugal       | Vouga River        |                             | -          | -          | KC583497             | Froufe et al., 2014   |
| V1           | IBER    | Portugal       | Vouga River        |                             | -          | -          | KC583511             | Froufe et al., 2014   |
| AA229        | IBER    | Portugal       | Tejo River         |                             | -          | -          | KC583468             | Froufe et al., 2014   |
| AA233        | IBER    | Portugal       | Tejo River         |                             | -          | -          | KC583469             | Froufe et al., 2014   |
| AA234        | IBER    | Portugal       | Tejo River         | Western Mediterranean Basin | -          | -          | KC583470             | Froufe et al., 2014   |
| AA237        | IBER    | Portugal       | Tejo River         |                             | -          | -          | KC583471             | Froufe et al., 2014   |
| AA242        | IBER    | Portugal       | Tejo River         |                             | -          | -          | KC583472             | Froufe et al., 2014   |
| AA257        | ITAL    | Spain          | Ebro River         |                             | 41.8534° N | 1.2316 ° W | KC583473             | Froufe et al., 2014   |
| AA258        | ITAL    | Spain          | Ebro River         |                             | 41.8534° N | 1.2316 ° W | KC583474             | Froufe et al., 2014   |
| AA259        | ITAL    | Spain          | Ebro River         |                             | 41.8534° N | 1.2316 ° W | KC583475             | Froufe et al., 2014   |
| AA260        | ITAL    | Spain          | Ebro River         |                             | 41.8534° N | 1.2316 ° W | MF414223             | Froufe et al., 2014   |
| AA261        | ITAL    | Spain          | Ebro River         |                             | 41.8534° N | 1.2316 ° W | MF414224             | Froufe et al., 2014   |
| AA263        | ITAL    | Spain          | Ebro River         |                             | 41.8534° N | 1.2316 ° W | KJ402053             | Froufe et al., 2014   |
| AA264        | ITAL    | Spain          | Ebro River         |                             | 41.8534° N | 1.2316 ° W | MF414225             | Froufe et al., 2014   |
| AA287        | IBER    | Spain          | Guadalquivir River | Atlantic Basin              | -          | -          | KC583476             | Froufe et al., 2014   |
| AA288        | IBER    | Spain          | Guadalquivir River |                             | -          | -          | KC583477             | Froufe et al., 2014   |
| AA289        | IBER    | Spain          | Guadalquivir River |                             | -          | -          | KC583478             | Froufe et al., 2014   |
| AA339        | IBER    | Spain          | Guadalquivir River |                             | -          | -          | KC583479             | Froufe et al., 2014   |
| AA341        | IBER    | Spain          | Barbate River      |                             | -          | -          | KC583480             | Froufe et al., 2014   |
| AA342        | IBER    | Spain          | Barbate River      |                             | -          | -          | KC583481             | Froufe et al., 2014   |
| AA369        | EUR1    | Hungary        | Danube River       | Black Sea Basin             | 46.7605° N | 17.2553° E | KC583482             | Froufe et al., 2014   |
| AA370        | EUR1    | Hungary        | Danube River       |                             | 46.7605° N | 17.2553° E | KC583483             | Froufe et al., 2014   |
| AA371        | EUR1    | Hungary        | Danube River       |                             | 46.7605° N | 17.2553° E | KC583484             | Froufe et al., 2014   |
| AA372        | EUR1    | Hungary        | Danube River       |                             | 46.7605° N | 17.2553° E | KC583485             | Froufe et al., 2014   |
| AA375        | EUR1    | Hungary        | Danube River       |                             | 46.7605° N | 17.2553° E | KC583486             | Froufe et al., 2014   |
| AA19         | IBER    | Portugal       | Guadiana River     | Atlantic Basin              | 38.6656° N | 7.0847° W  | KC583467             | Froufe et al., 2014   |
| AA173        | IBER    | Portugal       | Sado River         |                             | -          | -          | KC583464             | Froufe et al., 2014   |
| AA176        | IBER    | Portugal       | Sado River         |                             | -          | -          | KC583465             | Froufe et al., 2014   |
| AA179        | IBER    | Portugal       | Sado River         |                             | -          | -          | KC583466             | Froufe et al., 2014   |
| AA294        | IBER    | Spain          | Guadalquivir River |                             | -          | -          | KJ402054             | Froufe et al., 2014   |
| AC1          | IBER    | Portugal       | Vouga River        |                             | 40.5761° N | 8.5269° W  | KC583461             | Hinzmann et al., 2013 |
| AC3          | IBER    | Portugal       | Vouga River        |                             | 40.5761° N | 8.5269° W  | KC583462             | Hinzmann et al., 2013 |
| AC9          | IBER    | Portugal       | Vouga River        |                             | 40.5761° N | 8.5269° W  | KC583463             | Hinzmann et al., 2013 |
| AA1          | IBER    | Portugal       | Douro River        |                             | 41.5417° N | 7.7875° W  | KC583446             | Hinzmann et al., 2013 |
| AA3          | IBER    | Portugal       | Douro River        |                             | 41.5417° N | 7.7875° W  | KC583454             | Hinzmann et al., 2013 |
| AA11         | IBER    | Portugal       | Douro River        |                             | -          | -          | KC583447             | Hinzmann et al., 2013 |
| AA12         | IBER    | Portugal       | Douro River        |                             | -          | -          | KC583448             | Hinzmann et al., 2013 |
| AA13         | IBER    | Portugal       | Douro River        |                             | -          | -          | KC583449             | Hinzmann et al., 2013 |



| Voucher/Code   | Lineage | Country        | Freshwater Basin  | Basin               | Latitude   | Longitude  | COI seq. acc. number | Reference               |
|----------------|---------|----------------|-------------------|---------------------|------------|------------|----------------------|-------------------------|
| AA14           | IBER    | Portugal       | Guadiana River    |                     | 38.6656° N | 7.0847° W  | KC583450             | Hinzmann et al., 2013   |
| AA15           | IBER    | Portugal       | Guadiana River    |                     | 38.6656° N | 7.0847° W  | KC583451             | Hinzmann et al., 2013   |
| AA16           | IBER    | Portugal       | Guadiana River    |                     | 38.6656° N | 7.0847° W  | KC583452             | Hinzmann et al., 2013   |
| AA17           | IBER    | Portugal       | Guadiana River    |                     | 38.6656° N | 7.0847° W  | KC583453             | Hinzmann et al., 2013   |
| AA31           | IBER    | Portugal       | Douro River       |                     | 41.5653° N | 6.8808° W  | KC583455             | Hinzmann et al., 2013   |
| AA32           | IBER    | Portugal       | Douro River       |                     | 41.5653° N | 6.8808° W  | KC583456             | Hinzmann et al., 2013   |
| AA33           | IBER    | Portugal       | Douro River       |                     | 41.5653° N | 6.8808° W  | KC583457             | Hinzmann et al., 2013   |
| AA42           | IBER    | Portugal       | Minho River       |                     | 42.0511 °N | 8.5611° W  | KC583458             | Hinzmann et al., 2013   |
| AA51           | IBER    | Portugal       | Minho River       |                     | 42.0511 °N | 8.5611° W  | KC583459             | Hinzmann et al., 2013   |
| AA61           | IBER    | Portugal       | Minho River       |                     | 42.0511 °N | 8.5611° W  | KC583460             | Hinzmann et al., 2013   |
| 319            | EUR2    | Poland         | Vistula River     | Baltic Sea Basin    | -          | -          | GU230745             | Froufe et al., 2014     |
| 246N           | EUR2    | Poland         | Oder River        |                     | -          | -          | GU230742             | Froufe et al., 2014     |
| AanatAGA1.1    | IBER    | Portugal       | Douro River       | Atlantic Basin      | -          | -          | EF571387             | Reis et al., 2013       |
| AanatAGA2.1    | IBER    | Portugal       | Douro River       |                     | -          | -          | EF571388             | Reis et al., 2013       |
| AanatBAG1.2    | IBER    | Portugal       | Douro River       |                     | -          | -          | EF571389             | Reis et al., 2013       |
| AanatBAG2.2    | IBER    | Portugal       | Douro River       |                     | -          | -          | EF571390             | Reis et al., 2013       |
| AanatMOB1.4    | IBER    | Portugal       | Mondego River     |                     | -          | -          | EF571391             | Reis et al., 2013       |
| AanatMOB2.4    | IBER    | Portugal       | Mondego River     |                     | -          | -          | EF571392             | Reis et al., 2013       |
| AanatSDA1.5    | IBER    | Portugal       | Sado River        |                     | -          | -          | EF571393             | Reis et al., 2013       |
| AanatTAE1.7    | IBER    | Portugal       | Tejo River        |                     | -          | -          | EF571394             | Reis et al., 2013       |
| AanatTAE2.7    | IBER    | Portugal       | Tejo River        |                     | -          | -          | EF571395             | Reis et al., 2013       |
| AanatXA1.3     | IBER    | Portugal       | Guadiana River    |                     | -          | -          | EF571396             | Reis et al., 2013       |
| AanatXA2.3     | IBER    | Portugal       | Guadiana River    |                     | -          | -          | EF571397             | Reis et al., 2013       |
| PB12           | EUR2    | Russia: Crimea | Salgir River      | Black Sea Basin     | 45.4589° N | 34.7617° E | JQ253883             | Mezhzherin et al., 2014 |
| PB13           | EUR2    | Ukraine        | Dniester River    |                     | 46.4119° N | 30.2731° E | JQ253884             | Mezhzherin et al., 2014 |
| BIV1859        | EUR1    | France         | Vidourle River    | Mediterranean Basin | 43.7365° N | 4.1428° E  | MF414213             | Froufe et al., 2017     |
| BIV1862        | EUR1    | France         | Vidourle River    |                     | 43.7365° N | 4.1428° E  | MF414214             | Froufe et al., 2017     |
| BIV163         | EUR1    | Croatia        | Danube River      | Black Sea Basin     | 45.7697° N | 18.0661° E | MF414222             | Froufe et al., 2017     |
| NRM 42794-M056 | EUR2    | Sweden         | Indalsälven River | Baltic Sea Basin    | -          | -          | DQ060168             | Källersjö et al., 2005  |
| IT21           | ITAL    | Italy          | Reno River        | Adriatic Basin      | 44.1845° N | 11.2759° E | MF414231             | Froufe et al., 2017     |
| IT22           | ITAL    | Italy          | Reno River        |                     | 44.1845° N | 11.2759° E | MF414233             | Froufe et al., 2017     |
| IT23           | ITAL    | Italy          | Reno River        |                     | 44.1845° N | 11.2759° E | MF414234             | Froufe et al., 2017     |
| IT24           | ITAL    | Italy          | Reno River        |                     | 44.1845° N | 11.2759° E | MF414238             | Froufe et al., 2017     |
| IT25           | ITAL    | Italy          | Reno River        |                     | 44.1845° N | 11.2759° E | MF414239             | Froufe et al., 2017     |
| IT26           | ITAL    | Italy          | Reno River        |                     | 44.1845° N | 11.2759° E | MF414240             | Froufe et al., 2017     |
| IT27           | ITAL    | Italy          | Reno River        |                     | 44.1845° N | 11.2759° E | MF414241             | Froufe et al., 2017     |
| IT28           | ITAL    | Italy          | Reno River        |                     | 44.1845° N | 11.2759° E | MF414242             | Froufe et al., 2017     |
| IT29           | ITAL    | Italy          | Reno River        |                     | 44.1845° N | 11.2759° E | MF414243             | Froufe et al., 2017     |
| IT32           | ITAL    | Italy          | Reno River        |                     | 44.1845° N | 11.2759° E | MF414244             | Froufe et al., 2017     |
| IT33           | ITAL    | Italy          | Reno River        |                     | 44.1845° N | 11.2759° E | MF414245             | Froufe et al., 2017     |
| IT35           | ITAL    | Italy          | Reno River        |                     | 44.1845° N | 11.2759° E | MF414245             | Froufe et al., 2017     |
| IT361          | ITAL    | Italy          | Po River          |                     | 45.9803° N | 8.6443° E  | MF414247             | Froufe et al., 2017     |
| IT489          | ITAL    | Italy          | Po River          |                     | 45.9803° N | 8.6443° E  | MF414248             | Froufe et al., 2017     |
| IT493          | ITAL    | Italy          | Po River          |                     | 45.9803° N | 8.6443° E  | MF414249             | Froufe et al., 2017     |

| Voucher/Code | Lineage | Country     | Freshwater Basin  | Basin                       | Latitude   | Longitude  | COI seq. acc. number | Reference                     |
|--------------|---------|-------------|-------------------|-----------------------------|------------|------------|----------------------|-------------------------------|
| IT557        | ITAL    | Italy       | Brenta River      | Western Mediterranean Basin | 46.0140° N | 11.2862° E | MF414250             | Froufe et al., 2017           |
| IT558        | ITAL    | Italy       | Brenta River      |                             | 46.0140° N | 11.2862° E | MF414251             | Froufe et al., 2017           |
| IT581        | ITAL    | Italy       | Po River          |                             | 45.9803° N | 8.6443° E  | MF414252             | Froufe et al., 2017           |
| IT82         | ITAL    | Italy       | Tiber River       |                             | 43.0895° N | 12.1532° E | MF414232             | Froufe et al., 2017           |
| IT85         | ITAL    | Italy       | Tiber River       |                             | 43.0895° N | 12.1532° E | MF414235             | Froufe et al., 2017           |
| IT97         | ITAL    | Italy       | Tiber River       |                             | 43.0895° N | 12.1532° E | MF414236             | Froufe et al., 2017           |
| IT104        | ITAL    | Italy       | Tiber River       |                             | 43.0895° N | 12.1532° E | MF414230             | Froufe et al., 2017           |
| MNCN:N1122   | IBER    | Portugal    | Mira River        | Atlantic Basin              | -          | -          | KX399859             | Araujo et al., 2018           |
| MNCN N500    | IBER    | Spain       | Guadiana River    |                             | -          | -          | KP217914             | Araujo et al., 2017           |
| BIV2000      | IBER    | Morocco     | Oum Er-Rbia River |                             | -          | -          | MK733420             | Gomes-dos-Santos et al., 2019 |
| BIV2001      | IBER    | Morocco     | Oum Er-Rbia River |                             | -          | -          | MK733421             | Gomes-dos-Santos et al., 2019 |
| BIV2002      | IBER    | Morocco     | Oum Er-Rbia River |                             | -          | -          | MK733422             | Gomes-dos-Santos et al., 2019 |
| BIV2003      | IBER    | Morocco     | Oum Er-Rbia River |                             | -          | -          | MK733423             | Gomes-dos-Santos et al., 2019 |
| BIV2004      | IBER    | Morocco     | Oum Er-Rbia River |                             | -          | -          | MK733424             | Gomes-dos-Santos et al., 2019 |
| BIV2006      | IBER    | Morocco     | Oum Er-Rbia River |                             | -          | -          | MK733425             | Gomes-dos-Santos et al., 2019 |
| BIV2580      | IBER    | Morocco     | Loukos River      |                             | -          | -          | MK733426             | Gomes-dos-Santos et al., 2019 |
| BIV2581      | IBER    | Morocco     | Loukos River      |                             | -          | -          | MK733427             | Gomes-dos-Santos et al., 2019 |
| BIV2582      | IBER    | Morocco     | Loukos River      |                             | -          | -          | MK733428             | Gomes-dos-Santos et al., 2019 |
| BIV2583      | IBER    | Morocco     | Loukos River      |                             | -          | -          | MK733429             | Gomes-dos-Santos et al., 2019 |
| BIV2584      | IBER    | Morocco     | Loukos River      |                             | -          | -          | MK733430             | Gomes-dos-Santos et al., 2019 |
| BIV2585      | IBER    | Morocco     | Loukos River      |                             | -          | -          | MK733431             | Gomes-dos-Santos et al., 2019 |
| NMBE 559869  | EUR2    | Switzerland | Rhine River       | North Sea Basin             | 46.9377° N | 7.1244° E  | OK050190             | Pfarrer et al., 2022          |
| NMBE 559870  | EUR1    | Switzerland | Rhine River       |                             | 46.9053° N | 7.0559° E  | OK050192             | Pfarrer et al., 2022          |
| NMBE 559871  | EUR2    | Switzerland | Rhine River       |                             | 46.9053° N | 7.0559° E  | OK050192             | Pfarrer et al., 2022          |
| NMBE 559876  | EUR2    | Switzerland | Rhine River       |                             | 47.0109° N | 6.9806° E  | OK050195             | Pfarrer et al., 2022          |
| NMBE 559877  | EUR1    | Switzerland | Rhine River       |                             | 46.8053° N | 6.7456° E  | OK050196             | Pfarrer et al., 2022          |
| NMBE 559881  | EUR2    | Switzerland | Rhine River       |                             | 47.2040° N | 8.7169° E  | OK050200             | Pfarrer et al., 2022          |
| NMBE 559882  | EUR1    | Switzerland | Rhine River       |                             | 47.2040° N | 8.7169° E  | OK050201             | Pfarrer et al., 2022          |
| NMBE 559883  | EUR1    | Switzerland | Rhine River       |                             | 47.2040° N | 8.7169° E  | OK050202             | Pfarrer et al., 2022          |
| NMBE 559884  | EUR1    | Switzerland | Rhine River       |                             | 47.3669° N | 8.6708° E  | OK050203             | Pfarrer et al., 2022          |
| NMBE 559885  | EUR1    | Switzerland | Rhine River       |                             | 47.3669° N | 8.6708° E  | OK050204             | Pfarrer et al., 2022          |
| NMBE 559887  | EUR1    | Switzerland | Rhine River       |                             | 47.5730° N | 8.5720° E  | OK050206             | Pfarrer et al., 2022          |
| NMBE 559888  | EUR1    | Switzerland | Rhine River       |                             | 47.5730° N | 8.5720° E  | OK050207             | Pfarrer et al., 2022          |
| NMBE 559889  | EUR1    | Switzerland | Rhine River       |                             | 47.5730° N | 8.5720° E  | OK050208             | Pfarrer et al., 2022          |
| NMBE 565030  | EUR1    | Switzerland | Rhine River       |                             | 47.1471° N | 7.3709° E  | OK050211             | Pfarrer et al., 2022          |
| NMBE 565031  | EUR1    | Switzerland | Rhine River       |                             | 47.1471° N | 7.3709° E  | OK050212             | Pfarrer et al., 2022          |
| NMBE 565046  | EUR2    | Switzerland | Rhine River       |                             | 46.9377° N | 7.1244° E  | OK050222             | Pfarrer et al., 2022          |
| NMBE 565051  | EUR2    | Switzerland | Rhine River       |                             | 46.5619° N | 6.1692° E  | OK050227             | Pfarrer et al., 2022          |
| NMBE 565052  | EUR2    | Switzerland | Rhine River       |                             | 47.1340° N | 8.1895° E  | OK050228             | Pfarrer et al., 2022          |
| NMBE 565053  | EUR2    | Switzerland | Rhine River       |                             | 47.1340° N | 8.1895° E  | OK050229             | Pfarrer et al., 2022          |
| NMBE 565054  | EUR2    | Switzerland | Rhine River       |                             | 47.1340° N | 8.1895° E  | OK050230             | Pfarrer et al., 2022          |
| NMBE 565055  | ITAL    | Switzerland | Po River          | Adriatic Basin              | 46.1473° N | 8.7788° E  | OK050231             | Pfarrer et al., 2022          |

| Voucher/Code | Lineage | Country     | Freshwater Basin | Basin                       | Latitude   | Longitude  | COI seq. acc. number | Reference               |
|--------------|---------|-------------|------------------|-----------------------------|------------|------------|----------------------|-------------------------|
| NMBE 565056  | ITAL    | Switzerland | Po River         |                             | 46.1473° N | 8.7788° E  | OK050232             | Pfarrer et al., 2022    |
| NMBE 565057  | ITAL    | Switzerland | Po River         |                             | 46.1473° N | 8.7788° E  | OK050233             | Pfarrer et al., 2022    |
| NMBE 565062  | ITAL    | Switzerland | Po River         |                             | 46.1473° N | 8.7788° E  | OK050238             | Pfarrer et al., 2022    |
| NMBE 565063  | ITAL    | Switzerland | Po River         |                             | 46.1473° N | 8.7788° E  | OK050239             | Pfarrer et al., 2022    |
| NMBE 565064  | ITAL    | Switzerland | Po River         |                             | 46.1473° N | 8.7788° E  | OK050240             | Pfarrer et al., 2022    |
| NMBE 565065  | EUR1    | Switzerland | Po River         | North Sea Basin             | 46.1473° N | 8.7788° E  | OK050241             | Pfarrer et al., 2022    |
| NMBE 565077  | EUR1    | Switzerland | Rhine River      |                             | 47.1135° N | 9.4982° E  | OK050248             | Pfarrer et al., 2022    |
| NMBE 565078  | EUR2    | Switzerland | Rhine River      |                             | 47.1280° N | 9.3010° E  | OK050249             | Pfarrer et al., 2022    |
| NMBE 565079  | EUR1    | Switzerland | Rhine River      | Adriatic Basin              | 47.1280° N | 9.3010° E  | OK050250             | Pfarrer et al., 2022    |
| NMBE 565819  | ITAL    | Switzerland | Po River         |                             | 46.1473° N | 8.7788° E  | OK050253             | Pfarrer et al., 2022    |
| NMBE 566614  | EUR1    | Switzerland | Rhine River      | North Sea Basin             | 47.5829° N | 8.2343° E  | OK050254             | Pfarrer et al., 2022    |
| NMBE 566615  | EUR1    | Switzerland | Rhine River      |                             | 47.5829° N | 8.2343° E  | OK050255             | Pfarrer et al., 2022    |
| NMBE 566616  | EUR1    | Switzerland | Rhine River      |                             | 47.5829° N | 8.2343° E  | OK050256             | Pfarrer et al., 2022    |
| NMBE566619   | EUR2    | Switzerland | Rhine River      |                             | 47.1737° N | 8.1254° E  | OK050258             | Pfarrer et al., 2022    |
| NMBE566620   | EUR2    | Switzerland | Rhine River      |                             | 47.0236° N | 8.4638° E  | OK050259             | Pfarrer et al., 2022    |
| NMBE566621   | EUR2    | Switzerland | Rhine River      |                             | 47.0236° N | 8.4638° E  | OK050260             | Pfarrer et al., 2022    |
| NMBE566622   | EUR2    | Switzerland | Rhine River      |                             | 47.0236° N | 8.4638° E  | OK050261             | Pfarrer et al., 2022    |
| NMBE566623   | EUR1    | Switzerland | Rhine River      |                             | 47.0236° N | 8.4638° E  | OK050262             | Pfarrer et al., 2022    |
| NMBE566625   | EUR1    | Switzerland | Rhine River      |                             | 47.0236° N | 8.4638° E  | OK050263             | Pfarrer et al., 2022    |
| NMBE566626   | EUR1    | Switzerland | Rhine River      |                             | 47.3738° N | 8.3169° E  | OK050265             | Pfarrer et al., 2022    |
| NMBE566627   | EUR2    | Switzerland | Rhine River      |                             | 47.3738° N | 8.3169° E  | OK050266             | Pfarrer et al., 2022    |
| NMBE566628   | EUR2    | Switzerland | Rhine River      |                             | 47.1024° N | 8.6308° E  | OK050267             | Pfarrer et al., 2022    |
| NMBE566629   | EUR2    | Switzerland | Rhine River      |                             | 47.1024° N | 8.6308° E  | OK050268             | Pfarrer et al., 2022    |
| NMBE566630   | EUR2    | Switzerland | Rhine River      |                             | 47.0109° N | 6.9806° E  | OK050269             | Pfarrer et al., 2022    |
| SMF 354469   | EUR2    | Germany     | Rhine River      |                             | 50.3291° N | 8.8710° E  | OK050299             | Pfarrer et al., 2022    |
| A1IRAN       | AZOV    | Iran        | Sefid River      | Caspian Sea Basin           | 37.4159° N | 49.4385° E | MZ510931             | Lopes-Lima et al., 2021 |
| A2IRAN       | AZOV    | Iran        | Sefid River      |                             | 37.4159° N | 49.4385° E | MZ510932             | Lopes-Lima et al., 2021 |
| A3IRAN       | AZOV    | Iran        | Sefid River      |                             | 37.4159° N | 49.4385° E | MZ510933             | Lopes-Lima et al., 2021 |
| A4IRAN       | AZOV    | Iran        | Sefid River      |                             | 37.4159° N | 49.4385° E | MZ510934             | Lopes-Lima et al., 2021 |
| A6IRAN       | AZOV    | Iran        | Sefid River      |                             | 37.4159° N | 49.4385° E | MZ510935             | Lopes-Lima et al., 2021 |
| ACIRAN       | AZOV    | Iran        | Qarasu River     |                             | 36.8365° N | 54.0009° E | MZ510941             | Lopes-Lima et al., 2021 |
| ADIRAN       | AZOV    | Iran        | Qarasu River     |                             | 36.8365° N | 54.0009° E | MZ510942             | Lopes-Lima et al., 2021 |
| AEIRAN       | AZOV    | Iran        | Qarasu River     |                             | 36.8365° N | 54.0009° E | MZ510943             | Lopes-Lima et al., 2021 |
| BIV1884      | AZOV    | Turkey      | Kura River       | Eastern Mediterranean Basin | 39.9707° N | 41.8891° E | MZ510944             | Lopes-Lima et al., 2021 |
| BIV1896      | AZOV    | Turkey      | Kura River       |                             | 39.9707° N | 41.8891° E | MZ510945             | Lopes-Lima et al., 2021 |
| BIV2094      | EUR1    | Turkey      | Tersakan River   |                             | 36.7374° N | 28.8087° E | MZ510946             | Lopes-Lima et al., 2021 |
| BIV2095      | EUR1    | Turkey      | Tersakan River   |                             | 36.7374° N | 28.8087° E | MZ510947             | Lopes-Lima et al., 2021 |
| BIV2096      | EUR1    | Turkey      | Tersakan River   |                             | 36.7374° N | 28.8087° E | MZ510948             | Lopes-Lima et al., 2021 |
| BIV2097      | EUR1    | Turkey      | Tersakan River   |                             | 36.7374° N | 28.8087° E | MZ510949             | Lopes-Lima et al., 2021 |
| BIV2098      | EUR1    | Turkey      | Tersakan River   |                             | 36.7374° N | 28.8087° E | MZ510950             | Lopes-Lima et al., 2021 |
| BIV2238      | EUR2    | Turkey      | Susurluk River   |                             | 40.2252° N | 28.0528° E | MZ510951             | Lopes-Lima et al., 2021 |
| BIV2239      | EUR2    | Turkey      | Susurluk River   |                             | 40.2252° N | 28.0528° E | MZ510952             | Lopes-Lima et al., 2021 |
| BIV2240      | EUR2    | Turkey      | Susurluk River   |                             | 40.2252° N | 28.0528° E | MZ510953             | Lopes-Lima et al., 2021 |
| BIV2241      | EUR2    | Turkey      | Susurluk River   |                             | 40.2252° N | 28.0528° E | MZ510954             | Lopes-Lima et al., 2021 |
| BIV2242      | EUR2    | Turkey      | Susurluk River   |                             | 40.2252° N | 28.0528° E | MZ510955             | Lopes-Lima et al., 2021 |

| Voucher/Code | Lineage | Country | Freshwater Basin | Basin             | Latitude   | Longitude  | COI seq. acc. number | Reference               |
|--------------|---------|---------|------------------|-------------------|------------|------------|----------------------|-------------------------|
| BIV2278      | EUR2    | Turkey  | Susurluk River   | Caspian Sea Basin | 40.1363° N | 28.6744° E | MZ510956             | Lopes-Lima et al., 2021 |
| BIV2279      | EUR2    | Turkey  | Susurluk River   |                   | 40.1363° N | 28.6744° E | MZ510957             | Lopes-Lima et al., 2021 |
| BIV2280      | EUR2    | Turkey  | Susurluk River   |                   | 40.1363° N | 28.6744° E | MZ510958             | Lopes-Lima et al., 2021 |
| BIV2281      | EUR2    | Turkey  | Susurluk River   |                   | 40.1363° N | 28.6744° E | MZ510959             | Lopes-Lima et al., 2021 |
| BIV2282      | EUR2    | Turkey  | Susurluk River   |                   | 40.1363° N | 28.6744° E | MZ510960             | Lopes-Lima et al., 2021 |
| BIV2342      | EUR2    | Turkey  | Sapanca Lake     |                   | 40.7128° N | 30.1753° E | MZ510961             | Lopes-Lima et al., 2021 |
| BIV2343      | EUR2    | Turkey  | Sapanca Lake     |                   | 40.7128° N | 30.1753° E | MZ510962             | Lopes-Lima et al., 2021 |
| BIV2344      | EUR2    | Turkey  | Sapanca Lake     |                   | 40.7128° N | 30.1753° E | MZ510963             | Lopes-Lima et al., 2021 |
| BIV2345      | EUR2    | Turkey  | Sapanca Lake     |                   | 40.7128° N | 30.1753° E | MZ510964             | Lopes-Lima et al., 2021 |
| BIV3950      | EUR2    | Turkey  | Susurluk River   |                   | 39.4166° N | 28.1007° E | MZ510970             | Lopes-Lima et al., 2021 |
| BIV3952      | EUR2    | Turkey  | Susurluk River   |                   | 39.4166° N | 28.1007° E | MZ510971             | Lopes-Lima et al., 2021 |
| BIV3971      | EUR2    | Turkey  | Susurluk River   |                   | 40.1299° N | 27.9395° E | MZ510972             | Lopes-Lima et al., 2021 |
| BIV4117      | EUR1    | Turkey  | Maritsa River    |                   | 41.4281° N | 27.0989° E | MZ510978             | Lopes-Lima et al., 2021 |
| BIV4160      | EUR1    | Turkey  | Maritsa River    |                   | 40.7687° N | 26.5147° E | MZ510981             | Lopes-Lima et al., 2021 |
| BIV4161      | EUR1    | Turkey  | Maritsa River    |                   | 40.7687° N | 26.5147° E | MZ510982             | Lopes-Lima et al., 2021 |
| BIV4163      | EUR1    | Turkey  | Maritsa River    |                   | 41.2097° N | 27.1168° E | MZ510983             | Lopes-Lima et al., 2021 |
| BIV5396      | AZOV    | Turkey  | Kura River       |                   | 40.5658° N | 43.0602° E | MZ510984             | Lopes-Lima et al., 2021 |
| BIV5397      | AZOV    | Turkey  | Kura River       |                   | 40.5658° N | 43.0602° E | MZ510985             | Lopes-Lima et al., 2021 |
| BIV5398      | AZOV    | Turkey  | Kura River       |                   | 40.5658° N | 43.0602° E | MZ510986             | Lopes-Lima et al., 2021 |
| BIV5399      | AZOV    | Turkey  | Kura River       |                   | 40.5658° N | 43.0602° E | MZ510987             | Lopes-Lima et al., 2021 |
| BIV5400      | AZOV    | Turkey  | Kura River       |                   | 40.5658° N | 43.0602° E | MZ510988             | Lopes-Lima et al., 2021 |
